# Supplementary material for: ERK Inhibitor Ulixertinib Inhibits High-Risk Neuroblastoma Growth In Vitro and In Vivo
Source: MDPI journal article supplement (doi:10.3390/cancers14225534), 2022-11-10
Supplement: s1 [file s1]

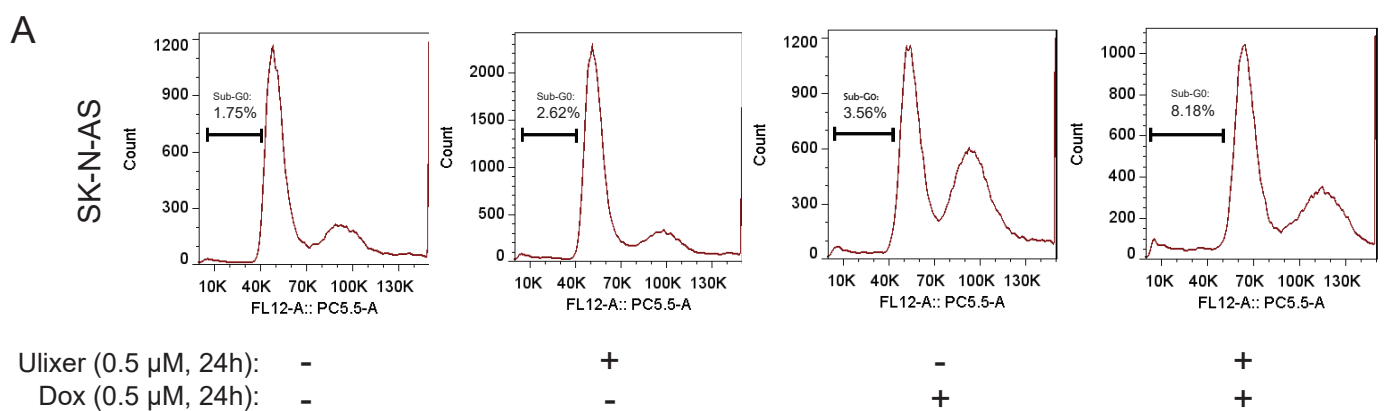

**B**

| SK-N-AS (sub-G0) |                |                 |                 |                 |
|------------------|----------------|-----------------|-----------------|-----------------|
|                  | Control (%)    | Ulixertinib (%) | Doxorubicin (%) | U+D (%)         |
| 1                | 1.75           | 2.62            | 3.56            | 8.18            |
| 2                | 2.04           | 2.40            | 3.81            | 7.82            |
| 3                | 1.62           | 2.24            | 3.03            | 8.04            |
| Aver $\pm$ SD    | 1.8 $\pm$ 0.22 | 2.42 $\pm$ 0.19 | 3.46 $\pm$ 0.40 | 8.02 $\pm$ 0.18 |

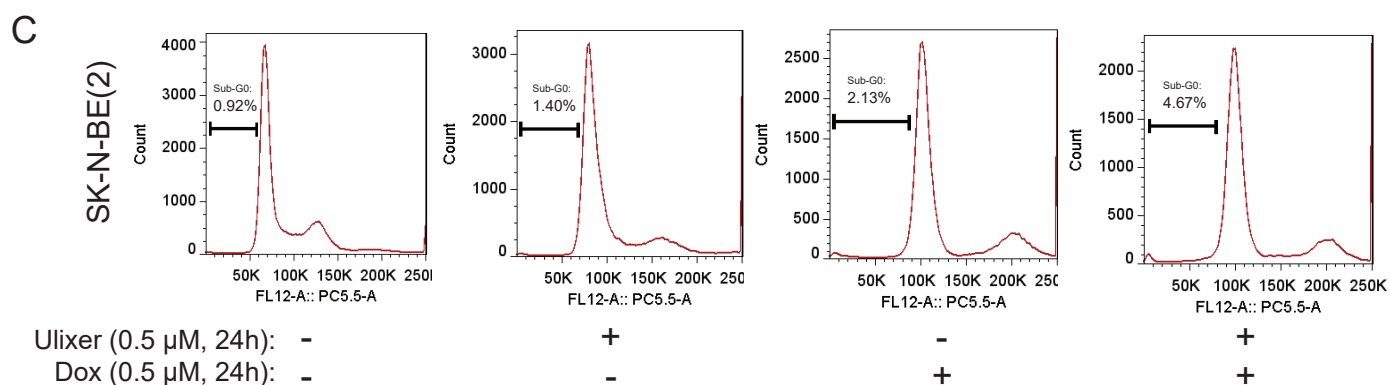

**D**

| SK-N-BE(2) (sub-G0) |                 |                 |                 |                 |
|---------------------|-----------------|-----------------|-----------------|-----------------|
|                     | Control (%)     | Ulixertinib (%) | Doxorubicin (%) | U+D (%)         |
| 1                   | 0.92            | 1.40            | 2.13            | 4.67            |
| 2                   | 1.12            | 1.66            | 2.60            | 4.18            |
| 3                   | 0.67            | 1.36            | 1.77            | 4.25            |
| Aver $\pm$ SD       | 0.90 $\pm$ 0.23 | 1.48 $\pm$ 0.16 | 2.17 $\pm$ 0.42 | 4.37 $\pm$ 0.27 |

Figure S3
