# Supplementary figures and images for: ERK Inhibitor Ulixertinib Inhibits High-Risk Neuroblastoma Growth In Vitro and In Vivo
Source: MDPI journal article supplement (doi:10.3390/cancers14225534), 2022-11-10

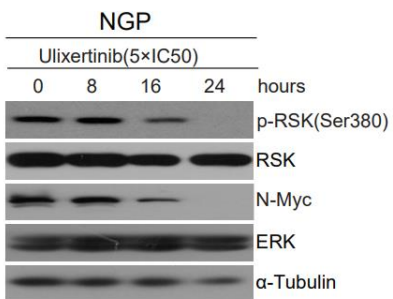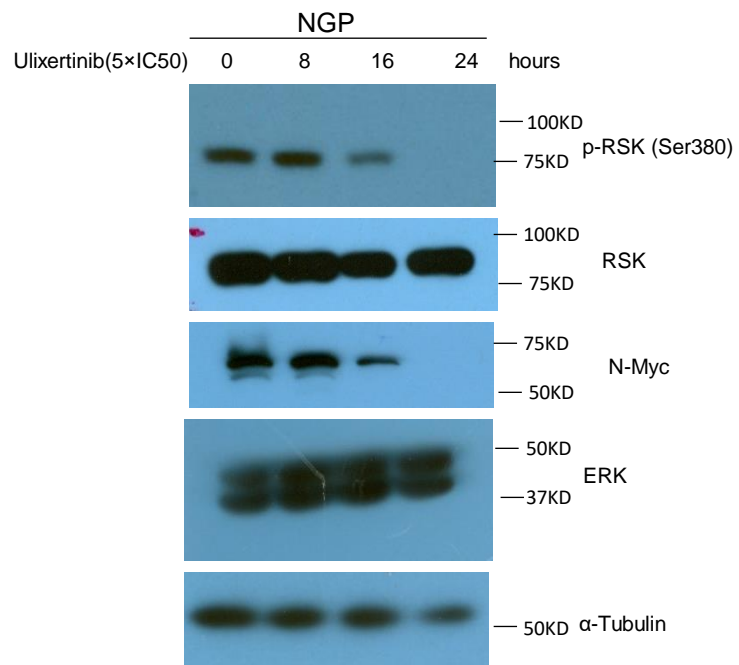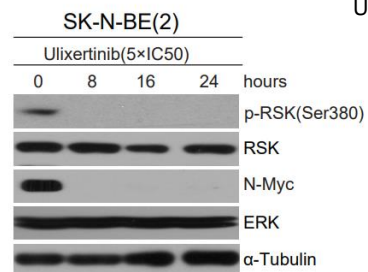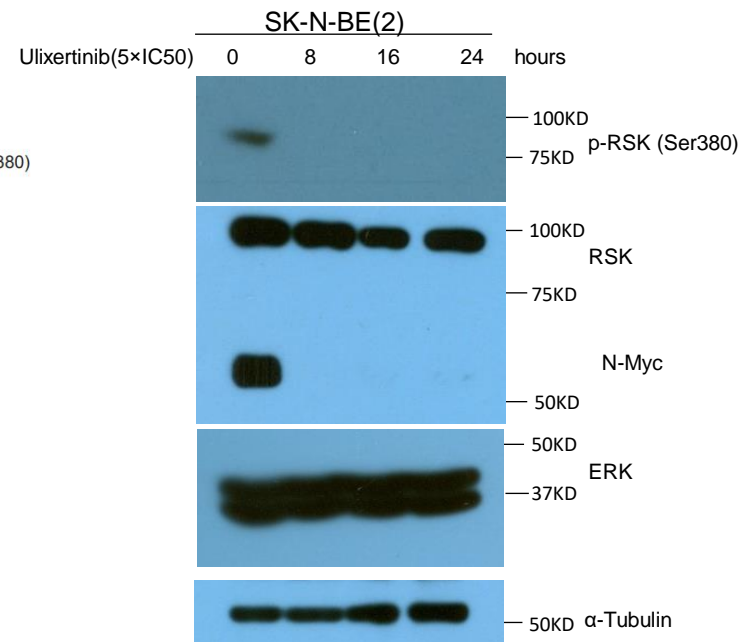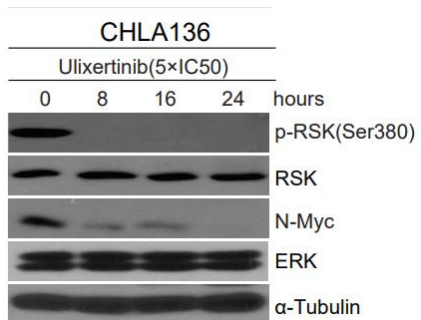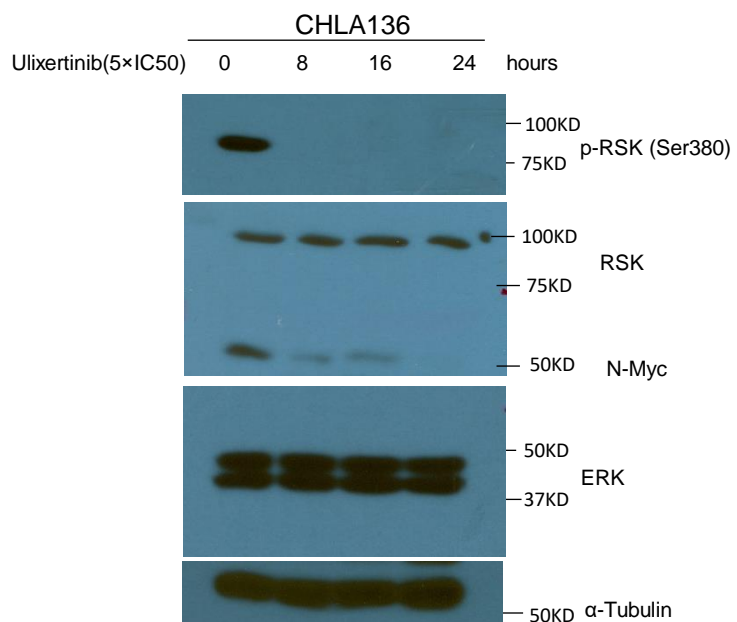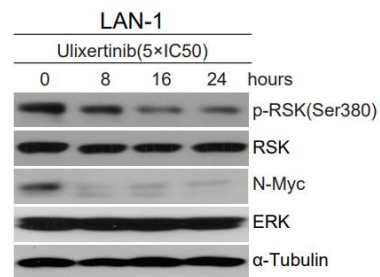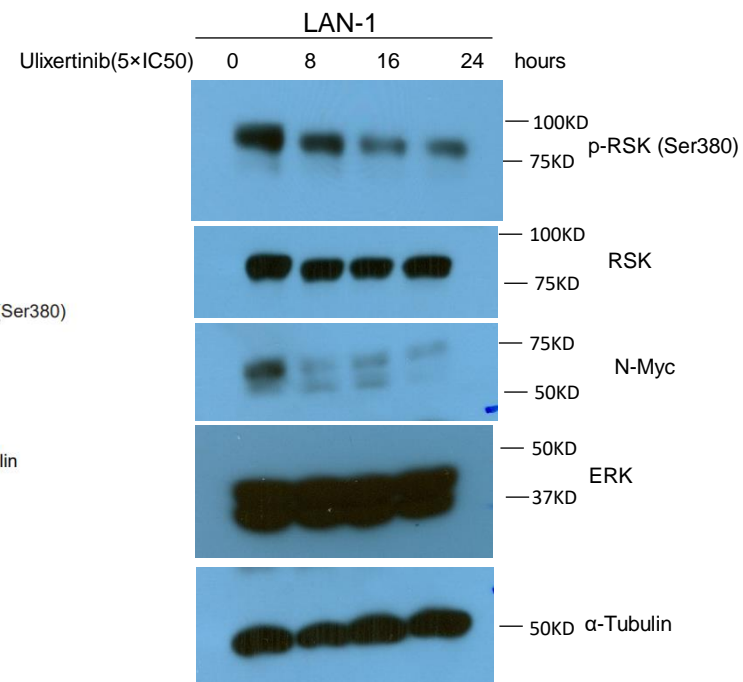

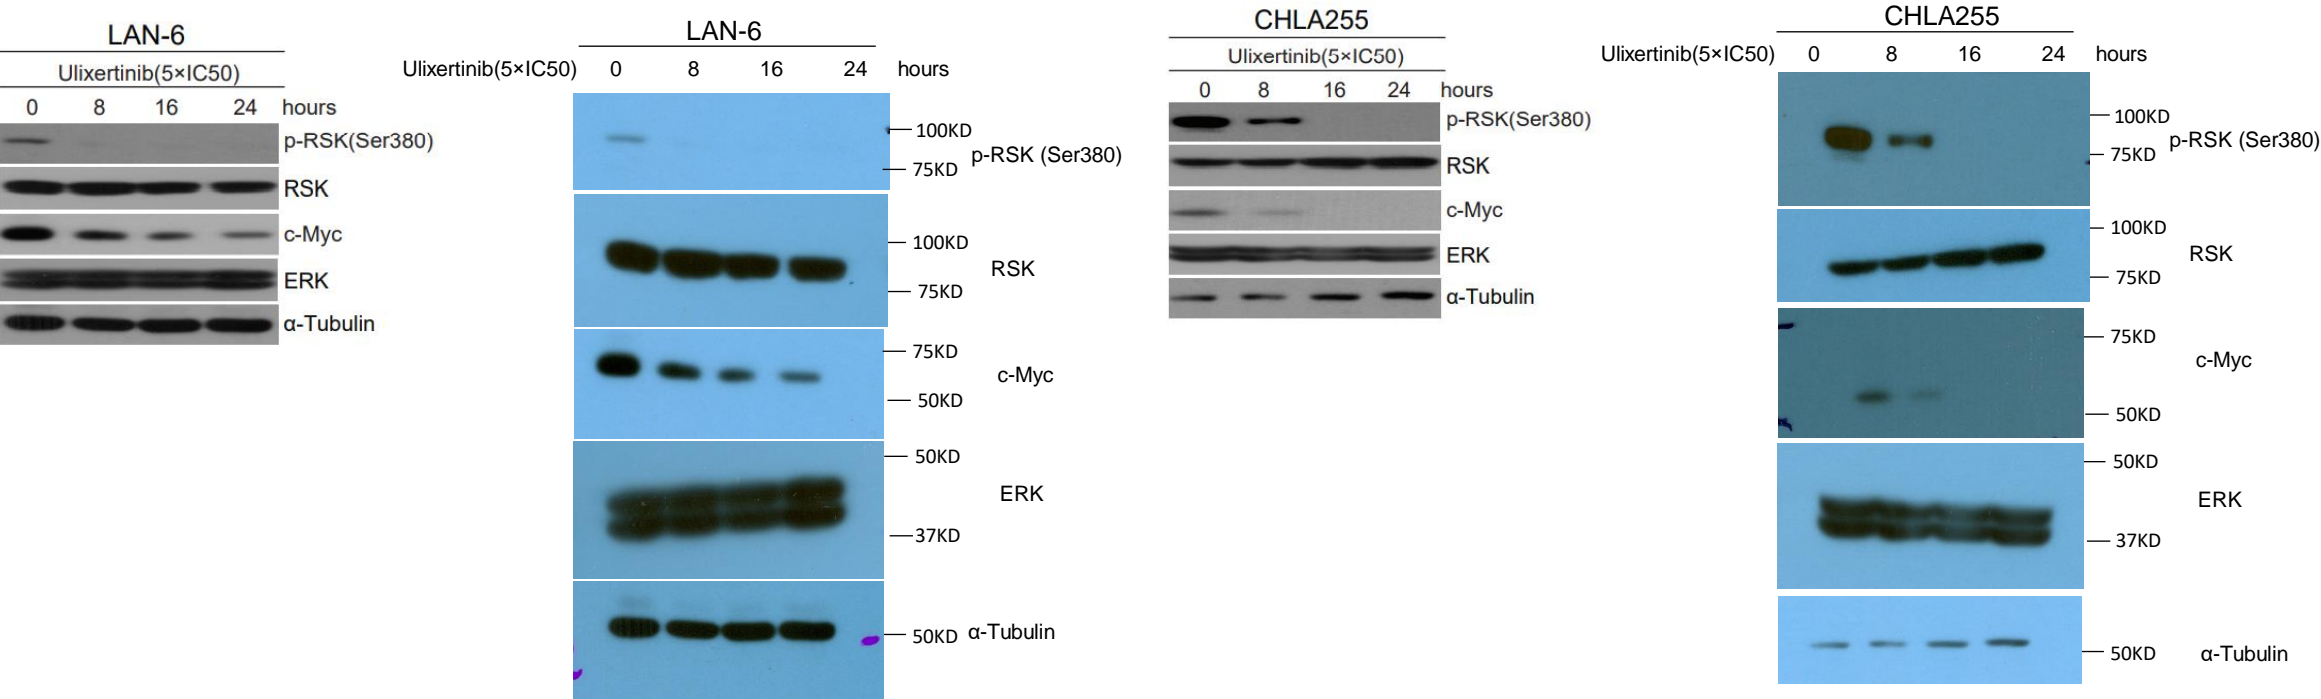

Figure. 2

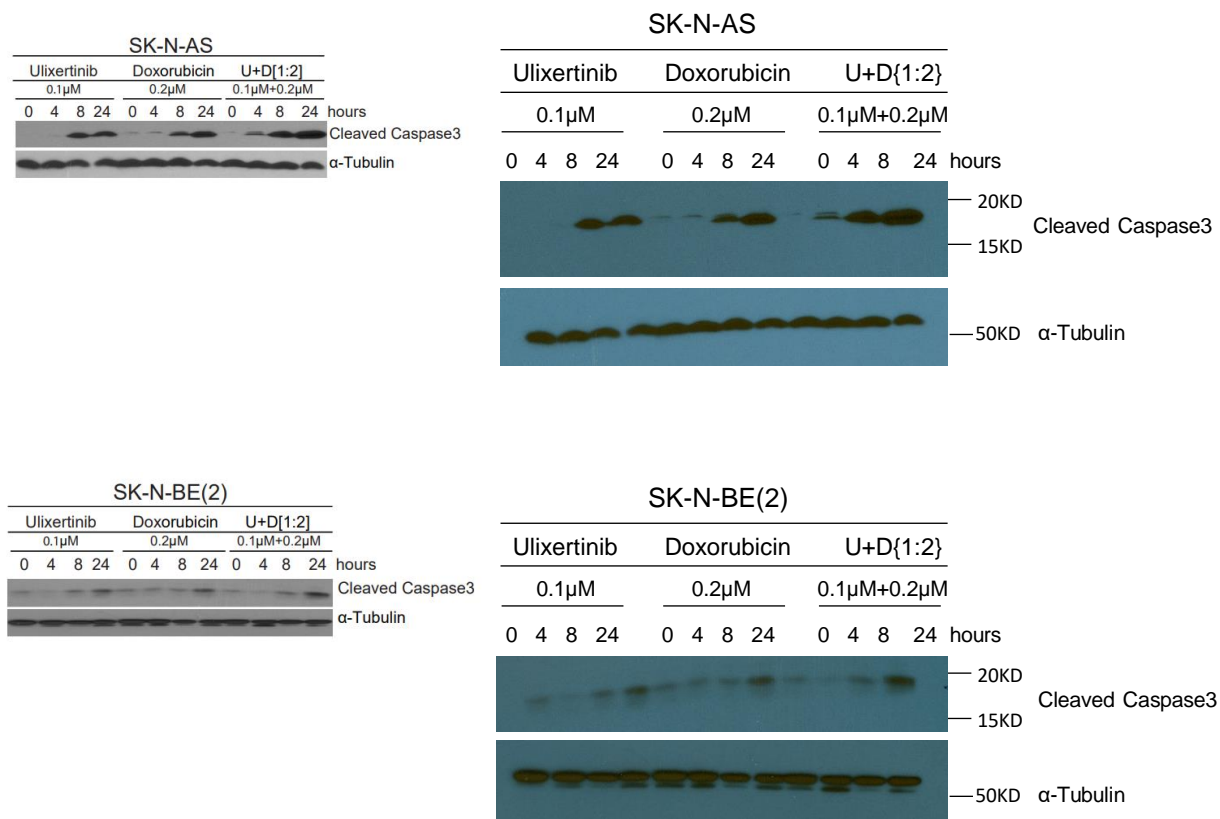

Figure. 4

Supplement: s1 [file s1]

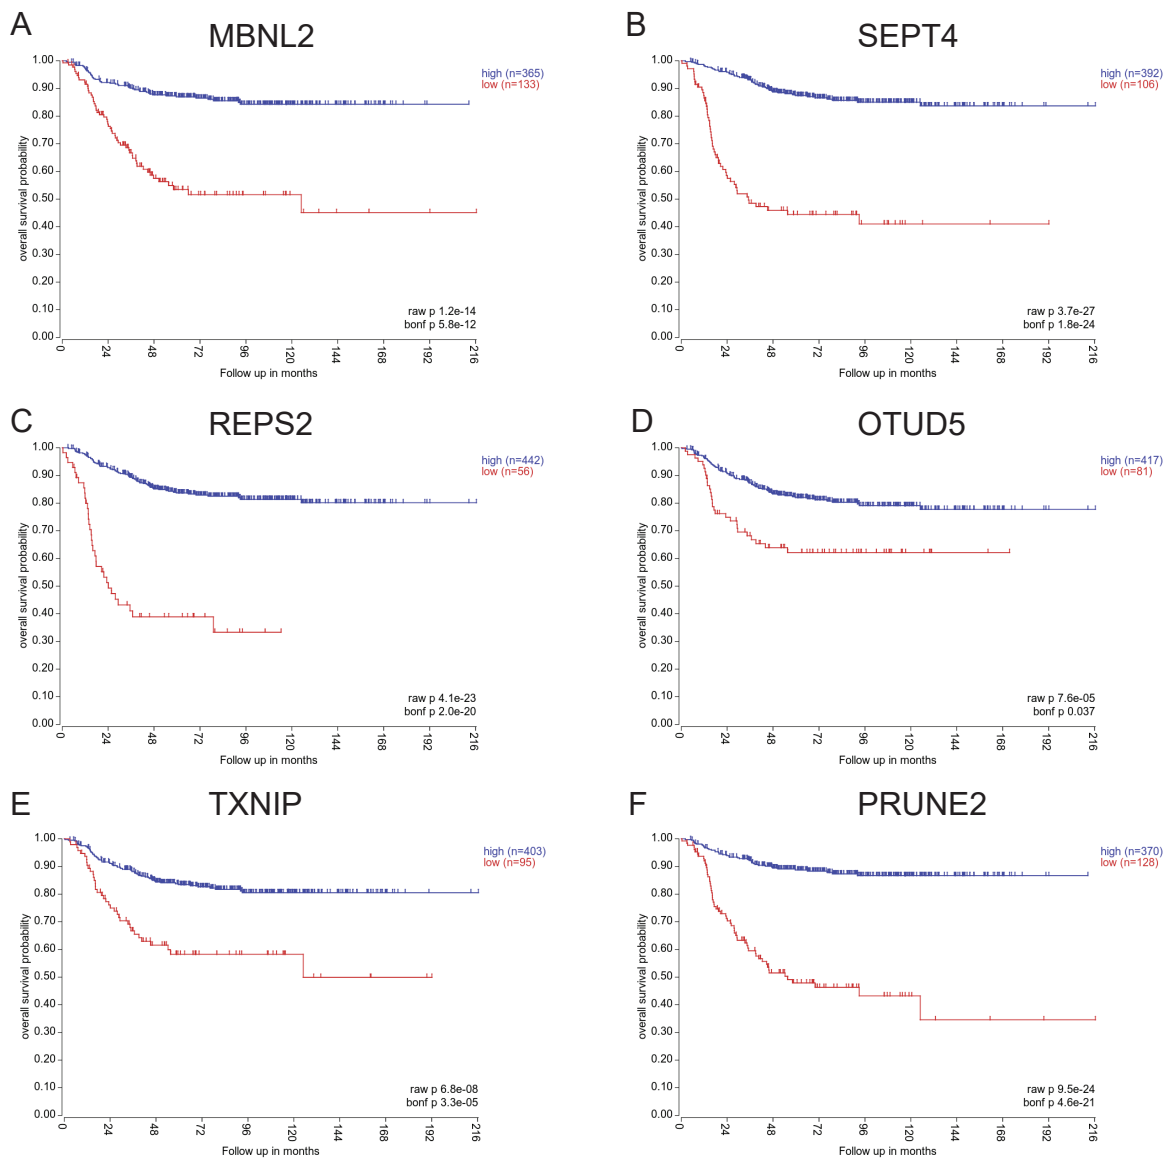

Figure S1

Supplement: s1 [file s1]

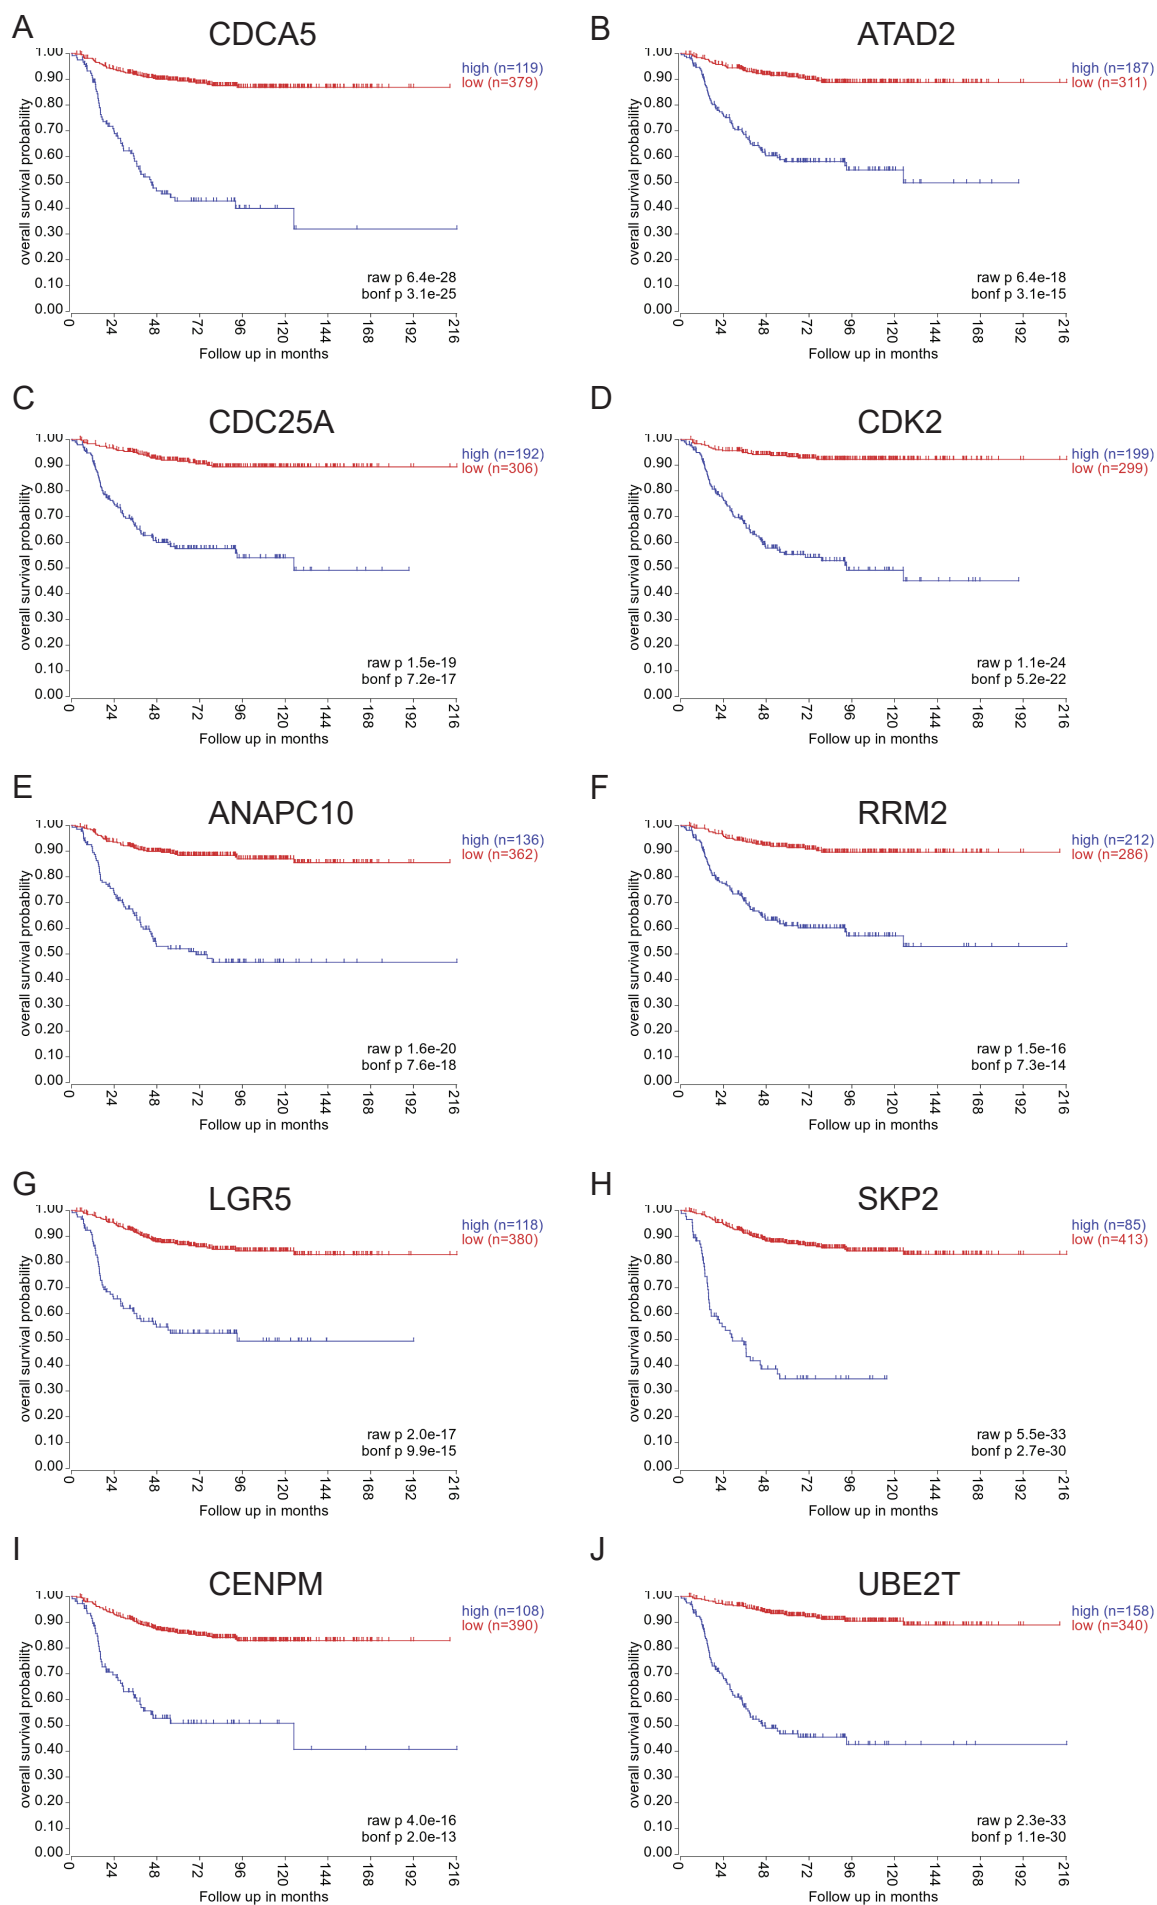

Figure S2

Supplement: s1 [file s1]
